# Supplementary material for: Joint analysis of the magnetic field and total gradient intensity in central Europe
Source: Copernicus journal article supplement (doi:10.5194/se-10-697-2019), 2019-05-23
Supplement: Supplementary file 1 [file se-10-697-2019-supplement.zip]

Archive with 3 entries (3 files):
- se-10-697-2019-supplement-title-page.pdf
- figS1.png
- supplement.pdf
