# Supplementary material for: Joint analysis of the magnetic field and total gradient intensity in central Europe
Source: Copernicus journal article supplement (doi:10.5194/se-10-697-2019), 2019-05-23
Supplement: Supplementary file 1 [file se-10-697-2019-supplement.zip › se-10-697-2019-supplement-title-page.pdf]

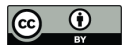

## *Supplement of*

# **Joint analysis of the magnetic field and total gradient intensity in central Europe**

**Maurizio Milano et al.**

*Correspondence to:* Maurizio Milano ([maurizio.milano@unina.it](mailto:maurizio.milano@unina.it))

- [se-10-697-2019-supplement-title-page.pdf](#)
- [figS1.png](#)
- [supplement.pdf](#)

The copyright of individual parts of the supplement might differ from the CC BY 4.0 License.
