# Supplementary figures and images for: Joint analysis of the magnetic field and total gradient intensity in central Europe
Source: Copernicus journal article supplement (doi:10.5194/se-10-697-2019), 2019-05-23

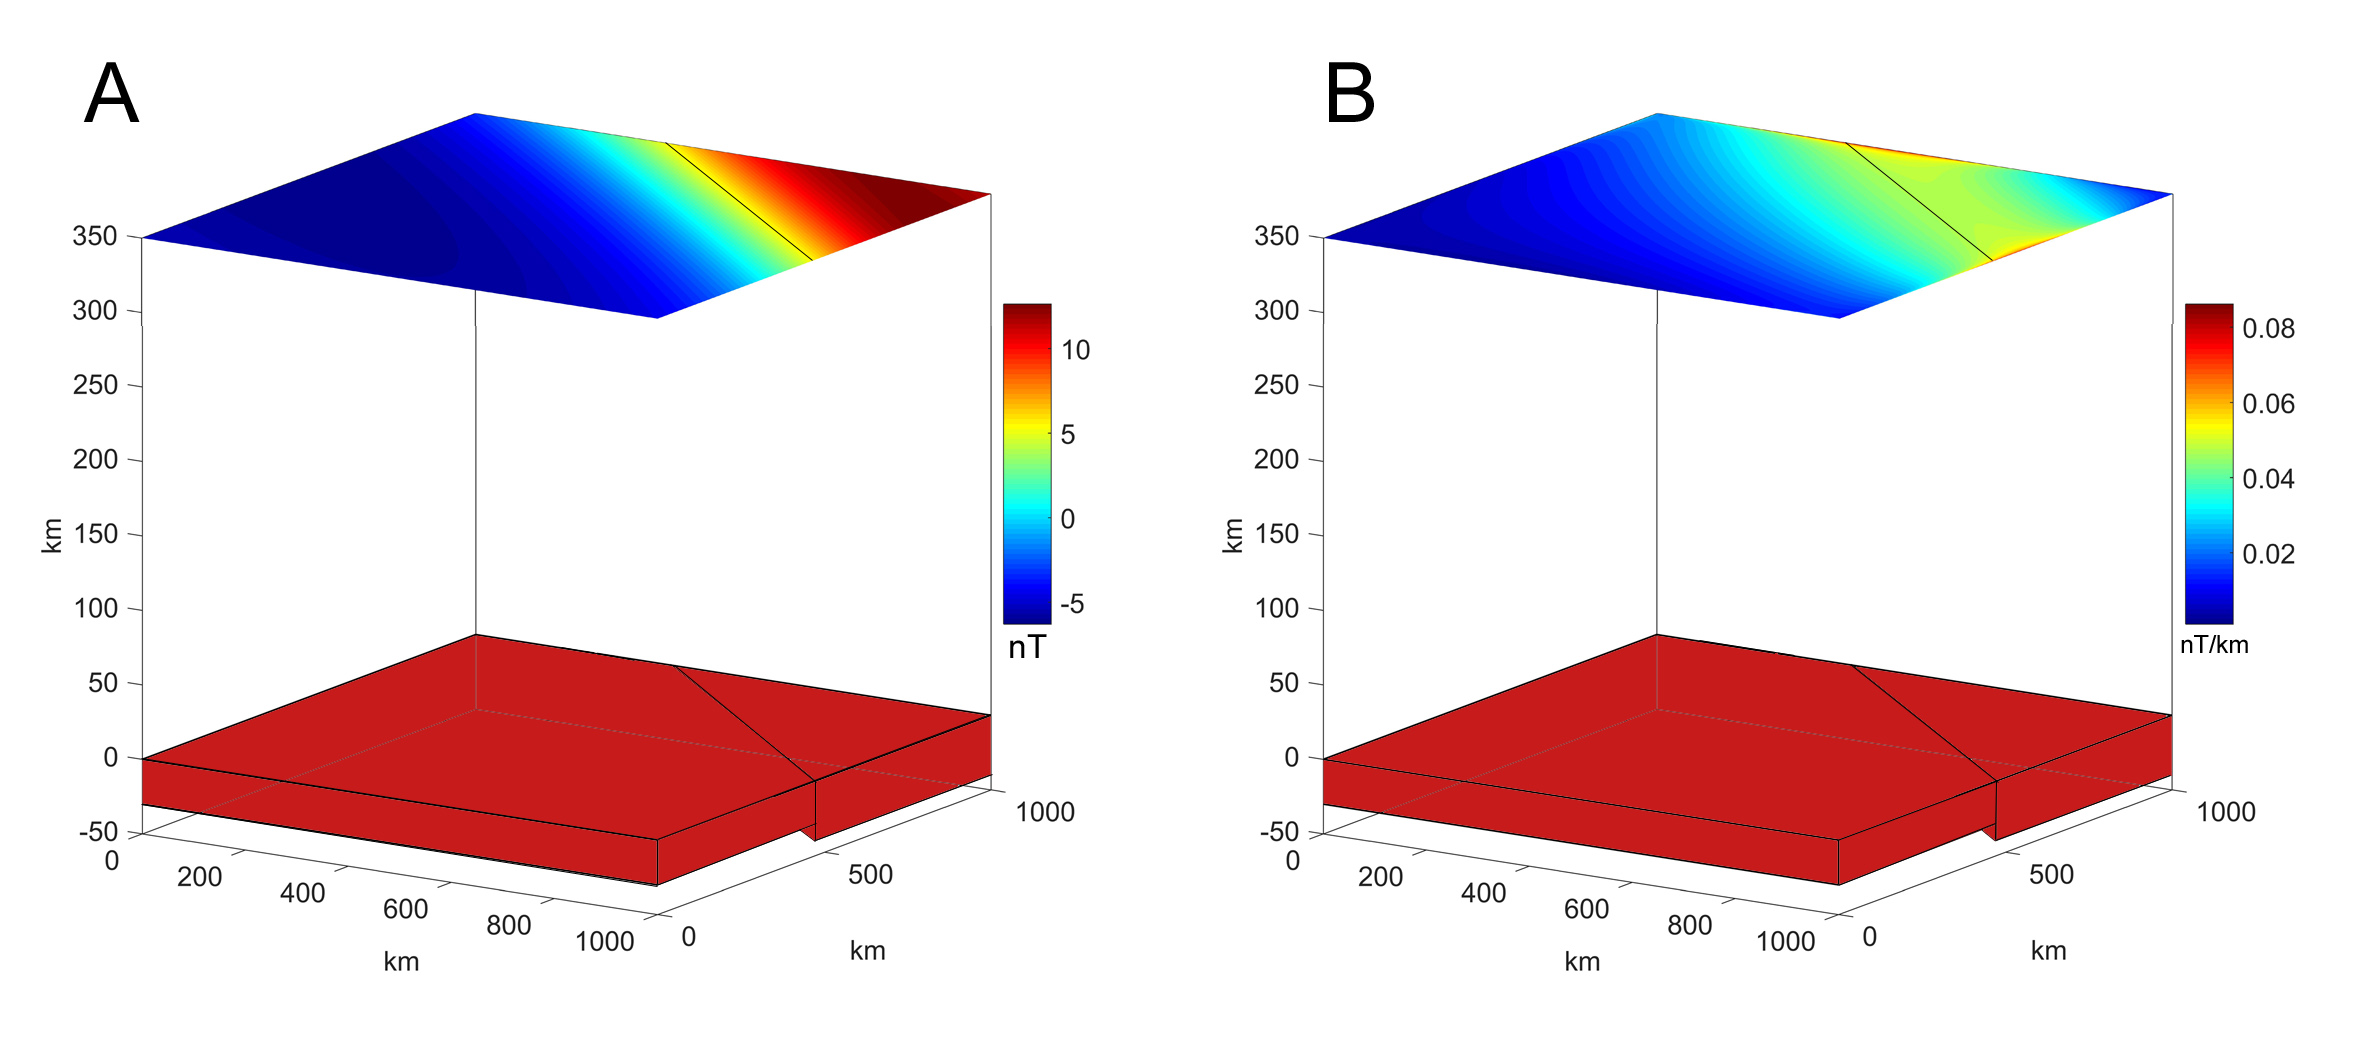

Supplement: Supplementary file 1 [file se-10-697-2019-supplement.zip › figS1.png]
